# Supplementary material
Source: HighWire-hosted journal article supplement (https://qualitysafety.bmj.com/highwire/filestream/147347/field_highwire_adjunct_files/0/bmjqs-2011-000585-s1.pdf)
Supplement: bmjqs-2011-000585-s1.pdf [file bmjqs-2011-000585-s1.pdf]

## Appendix 1: Detailed Summary of Systematic Review

| Study, Methodologic Feature Score, Funding                                              | Type of Analysis, Modelling Method          | Effectiveness Data Safety Improvement Strategies                                                                                                         | Cost Data                                                                         | Cohort and Time Horizon for Analysis                                                 | Main Outcome Measures and Discounting                                          | Results of Base Case Analysis                                          | Results: Sensitivity Analysis                                                                                                  | Limitations                                                                                                                   |
|-----------------------------------------------------------------------------------------|---------------------------------------------|----------------------------------------------------------------------------------------------------------------------------------------------------------|-----------------------------------------------------------------------------------|--------------------------------------------------------------------------------------|--------------------------------------------------------------------------------|------------------------------------------------------------------------|--------------------------------------------------------------------------------------------------------------------------------|-------------------------------------------------------------------------------------------------------------------------------|
| Adverse Drug Events (ADEs)                                                              |                                             |                                                                                                                                                          |                                                                                   |                                                                                      |                                                                                |                                                                        |                                                                                                                                |                                                                                                                               |
| <p>Karnon 2009 [1]</p> <p>Methodologic feature score = 27</p> <p>Funding not stated</p> | <p>Cost utility Decision analytic model</p> | <p>One randomized trial of pharmacist-led medication reconciliation [2], non-randomized trials [3-6]</p> <p>Pharmacist-led medication reconciliation</p> | <p>Case control studies [7-9];</p> <p>Case series with attributable costs [9]</p> | <p>Patients at risk of medication error due to lack of medication reconciliation</p> | <p>Cost per Quality Adjusted Life Year (QALY) gained</p> <p>No discounting</p> | <p>Pharmacist-led medication reconciliation is a dominant strategy</p> | <p>Pharmacist-led medication reconciliation remained the dominant strategy as long as a value is attached to a QALY gained</p> | <p>Effectiveness based on single small randomized controlled trial; no utility measures available so these were estimated</p> |

| Study, Methodologic Feature Score, Funding                                               | Type of Analysis, Modelling Method                       | Effectiveness Data Safety Improvement Strategies                                             | Cost Data                            | Cohort and Time Horizon for Analysis                           | Main Outcome Measures and Discounting                                 | Results of Base Case Analysis                                                                                                                                                                       | Results: Sensitivity Analysis                           | Limitations                             |
|------------------------------------------------------------------------------------------|----------------------------------------------------------|----------------------------------------------------------------------------------------------|--------------------------------------|----------------------------------------------------------------|-----------------------------------------------------------------------|-----------------------------------------------------------------------------------------------------------------------------------------------------------------------------------------------------|---------------------------------------------------------|-----------------------------------------|
| Transfusion-related Adverse Events (AE) in critically ill patients                       |                                                          |                                                                                              |                                      |                                                                |                                                                       |                                                                                                                                                                                                     |                                                         |                                         |
| <p>Shermock 2005 [10]</p> <p>Drummond Checklist score = 28</p> <p>Funding not stated</p> | <p>Cost effectiveness</p> <p>Decision analytic model</p> | <p>Randomized control trial [11]</p> <p>Use of EPO in preventing transfusion-related AEs</p> | <p>Randomized control trial [11]</p> | <p>Patients at risk of contracting transfusion-related AEs</p> | <p>Cost to avoid one transfusion-related AE</p> <p>No discounting</p> | <p>Incremental cost: \$4,700,000 to avoid one transfusion-related AE, \$25,600,000 to avoid one serious transfusion-related AE, and \$71,800,000 to avoid a likely fatal transfusion-related AE</p> | <p>Results withstood extensive sensitivity analysis</p> | <p>Single estimate of effectiveness</p> |

| Study, Methodologic feature score, Funding                                                                   | Type of Analysis, Modelling Method                       | Effectiveness Data Safety Improvement Strategies           | Cost Data                                                          | Cohort and Time Horizon for Analysis                                                            | Main Outcome Measures and Discounting                                                                                | Results of Base Case Analysis                                                                                                                                                                                                             | Results: Sensitivity Analysis                                                                                                                                                                   | Limitations        |
|--------------------------------------------------------------------------------------------------------------|----------------------------------------------------------|------------------------------------------------------------|--------------------------------------------------------------------|-------------------------------------------------------------------------------------------------|----------------------------------------------------------------------------------------------------------------------|-------------------------------------------------------------------------------------------------------------------------------------------------------------------------------------------------------------------------------------------|-------------------------------------------------------------------------------------------------------------------------------------------------------------------------------------------------|--------------------|
| Catheter-related bloodstream infections (CRBSI)                                                              |                                                          |                                                            |                                                                    |                                                                                                 |                                                                                                                      |                                                                                                                                                                                                                                           |                                                                                                                                                                                                 |                    |
| <p>Maenthaisong 2006 [12]</p> <p>Methodologic feature score = 25</p> <p>Funded by Thailand Research Fund</p> | <p>Cost-effectiveness</p> <p>Decision analytic model</p> | <p>Randomized control trials from a meta-analysis [13]</p> | <p>Published reports from national health security office [14]</p> | <p>Catheterized patients at Siriraj hospital, Thailand, for the duration of hospitalization</p> | <p>Incidence of catheter-related bloodstream infections (CRBSI) and death related to CRBSI</p> <p>No discounting</p> | <p>Chlorhexidine gluconate showed a cost savings of 304.49 Baht in central line catheter sites and 13.56 Baht per catheter in peripheral line catheter site with a 1.16% decrease in incidence of CRBSI and a 0.32% decrease in death</p> | <p>Chlorhexidine gluconate increased direct medical costs by 3.29 Baht. Cost of CRBSI was the cost driver in worst-case scenario, but did not increase rate of CRBSI nor death due to CRBSI</p> | <p>None listed</p> |

| Study, Methodologic feature score, Funding                                                                                                                              | Type of Analysis, Modelling Method                       | Effectiveness Data Safety Improvement Strategies | Cost Data                                                   | Cohort and Time Horizon for Analysis                              | Main Outcome Measures and Discounting                                                      | Results of Base Case Analysis                                                                         | Results: Sensitivity Analysis                                                                                                             | Limitations                                                                                                   |
|-------------------------------------------------------------------------------------------------------------------------------------------------------------------------|----------------------------------------------------------|--------------------------------------------------|-------------------------------------------------------------|-------------------------------------------------------------------|--------------------------------------------------------------------------------------------|-------------------------------------------------------------------------------------------------------|-------------------------------------------------------------------------------------------------------------------------------------------|---------------------------------------------------------------------------------------------------------------|
| Central Line Associated Blood Stream Infection (CLABSI)                                                                                                                 |                                                          |                                                  |                                                             |                                                                   |                                                                                            |                                                                                                       |                                                                                                                                           |                                                                                                               |
| <p>Waters 2011 [15]</p> <p>Methodologic feature score = 20</p> <p>Funded by Blue Cross Blue Shield of Michigan through the Michigan Health and Hospital Association</p> | <p>Cost-effectiveness</p> <p>Decision analytic model</p> | <p>Interrupted time series [16]</p>              | <p>Activity-based Costing through interviews with staff</p> | <p>Patients at risk of CLABSIs</p> <p>Three year time horizon</p> | <p>Cases of CLABSI averted by the intervention for each hospital</p> <p>No discounting</p> | <p>Intervention cost was about \$3,375 per infection averted and considered economically dominant</p> | <p>If the median hospital infection rate was used as the main outcome rather than the mean then cost per infection averted is \$4,725</p> | <p>Results may not be generalizable outside of Michigan and did not include longer term health care costs</p> |

| Study, Methodologic feature score, Funding                                                   | Type of Analysis, Modelling Method                                | Effectiveness Data Safety Improvement Strategies                                                                                                                                                                                                                                                                                                      | Cost Data                                                                                                                                                                          | Cohort and Time Horizon for Analysis                                                                               | Main Outcome Measures and Discounting                                                                   | Results of Base Case Analysis                                                                                                                                                                      | Results: Sensitivity Analysis                                                                           | Limitations                                                                                                                         |
|----------------------------------------------------------------------------------------------|-------------------------------------------------------------------|-------------------------------------------------------------------------------------------------------------------------------------------------------------------------------------------------------------------------------------------------------------------------------------------------------------------------------------------------------|------------------------------------------------------------------------------------------------------------------------------------------------------------------------------------|--------------------------------------------------------------------------------------------------------------------|---------------------------------------------------------------------------------------------------------|----------------------------------------------------------------------------------------------------------------------------------------------------------------------------------------------------|---------------------------------------------------------------------------------------------------------|-------------------------------------------------------------------------------------------------------------------------------------|
| Retained Surgical Foreign Bodies                                                             |                                                                   |                                                                                                                                                                                                                                                                                                                                                       |                                                                                                                                                                                    |                                                                                                                    |                                                                                                         |                                                                                                                                                                                                    |                                                                                                         |                                                                                                                                     |
| <p>Regenbogen 2009 [17]</p> <p>Methodologic feature score = 24</p> <p>Funding not stated</p> | <p>Cost effectiveness analysis</p> <p>Decision analytic model</p> | <p>Randomized control study of bar coded sponges [18] and epidemiologic studies providing estimates of sensitivity and specificity of standard counts and universal radiography [19,20] Comparing standard counting against alternative strategies: universal or selective x-ray, bar-coded sponges (BCS), and radiofrequency-tagged (RF) sponges</p> | <p>Published literature [21,22]</p> <p>OR managers at the hospital, University of California, San Francisco Medical Center, and the Hospital of the University of Pennsylvania</p> | <p>Average risk of inpatient operation from published literature [18-20,23]</p> <p>Duration of hospitalization</p> | <p>Retained sponges incidence and cost-effectiveness ratios for each strategy</p> <p>No discounting</p> | <p>Standard count \$1,500 per retained sponge averted; Bar-coded sponges \$95,000 per retained sponges averted; Routine intraoperative radiology over \$1 million per retained sponges averted</p> | <p>Results were robust over the plausible range of effectiveness assumptions, but sensitive to cost</p> | <p>Evidence of effectiveness for some comparisons within this analysis came from lower quality studies such as cadaver studies.</p> |

## Reference List

1. Karnon J, Campbell F, Czoski-Murray C. Model-based cost-effectiveness analysis of interventions aimed at preventing medication error at hospital admission (medicines reconciliation). *J Eval Clin Pract* 2009; 15: 299-306.
2. Kwan Y, Fernandes O, Nagge J et al. Implementation and a randomized controlled evaluation of pharmacists medication assessments in a surgical preadmission clinic. *Pharmacotherapy* 2005; 25: 1462.
3. Bates DW, Leape LL, Petrycki S. Incidence and preventability of adverse drug events in hospitalized adults. *J Gen Intern Med* 1993; 8: 289-94.
4. Mcfazdean E, Isles C, Moffar J et al. Is there a role for a prescribing pharmacist in preventing prescribing errors in the medical admissions ward? *Pharmaceutical Journal* 2003; 270: 896-9.
5. Scarsi KK, Fotis MA, Noskin GA. Pharmacist participation in medical rounds reduces medication errors. *Am J Health-Syst Pharm* 2002; 59: 2089-92.
6. Collins DJ, Nickless GD, Green CF. Medication histories: does anyone know what medicines a patients should be taking? *International Journal of Pharmacy Practice* 2004; 12: 173-8.
7. Bates DW, Spell N, Cullen DJ et al. The costs of adverse drug events in hospitalized patients. *Adverse Drug Events Prevention Study Group* 1997; 307-11.
8. Pinilla J, Murillo C, Carrasco F et al. Case-Control analysis of the financial cost of medication errors in hospitalized patients. *European Journal of Health Economics* 2006; 7: 66-71.

9. Classen DC. Adverse drug events in hospitalized patients: excess length of stay, extra costs, and attributable mortality. *JAMA* 1997; 277: 301-6.
10. Shermock KM, Horn E, Lipsett PA et al. Number needed to treat and cost of recombinant human erythropoietin to avoid one transfusion-related adverse event in critically ill patients. *Crit Care Med* 2005; 33: 497-503.
11. Corwin HL, Gettinger A, Pearl RG et al. Efficacy of recombinant human erythropoietin in critically ill patients. *JAMA* 2002; 288: 2827-35.
12. Maenthaisong R, Chaiyakunapruk N, Thamlikitkul V. Cost-effectiveness analysis of chlorhexidine gluconate compared with povidone-iodine solution for catheter-site care in Siriraj hospital, Thailand. *J Med Assoc Thai* 2006; 89: S94-S101.
13. Chaiyakunapruk N, Veenstra DL, Lipsky BA et al. Chlorhexidine compared with povidone-iodine solution for vascular catheter-site care: A meta-analysis. *Ann Intern Med* 2002; 136: 792-801.
14. National Health Security Office. J Diagnosis Related Group Relative Weight 2002-2003. 182-188. 2003.
15. Waters HR, Korn R Jr., Colantuoni E et al. The business case for quality: Economic analysis of the Michigan Keyston patient safety program in ICUs. *Am J Med Qual* 2011; 26: 333-9.
16. Pronovost P, Needleman J, Berenholtz SM et al. An intervention to reduce catheter-related bloodstream infections in the ICU. *N Engl J Med* 2006; 355: 2725-32.

17. Regenbogen SE, Greenberg CC, Resch SC et al. Prevention of retained surgical sponges: A decision-analytic model predicting relative cost-effectiveness. *Surgery* 2009; 145: 527-35.
18. Greenberg CC, Diaz-Flores R, Lipsitz SR et al. Bar-coding surgical sponges to improve safety: A randomized control trial. *Ann Surg* 2008; 247: 612-6.
19. Cima RR, Kollengode A, Garnatz J et al. Incidence and characteristics of potential and actual retained foreign object events in surgical patients. *J Am Coll Surg* 2008; 207: 80-7.
20. Revesz G, Siddiqi TS, Buchheit WA et al. Detection of retained surgical sponges. *Radiology* 1983; 149: 411-3.
21. Gawande AA, Studdert DM, Orav EJ et al. Risk factors for retained instruments and sponges after surgery. *N Engl J Med* 2003; 348: 229-35.
22. Egorova NN, Moskowits A, Gelijins A et al. Managing the prevention of retained surgical instruments. What is the value of counting? *Ann Surg* 2008; 247: 13-8.
23. Forgue E, Aimes A. *Les "Pieges" de la Chirurgie*, Paris: Masson et Cie, 1939.
